# Supplementary material for: Genetic Bottlenecks in Time and Space: Reconstructing Invasions from Contemporary and Historical Collections
Source: PLoS One. 2014 Sep 5;9(9):e106874. doi: 10.1371/journal.pone.0106874 (PMC4156389; doi:10.1371/journal.pone.0106874)
Supplement: Appendix S2 — Microsatellite loci allele call data for all samples in genalex format. (XLSX) [file pone.0106874.s010.xlsx]

## Sheet: SA & AU nSSRs
7	611	31	20	20	20	20	20	20	20	19	20	19	20	20	16	20	19	20	20	20	20	20	20	20	20	20	20	20	19	20	20	19	20	2	218	393
Senecio madagascariensis codominant data			Vryheid	Denny_Dalton	Ongoye	Tinley_Manor	Pietermaritzburg	Summerveld	Durban	Richmond	Pennington	Port_Edward	Boesmansriviermond	Herberton	Malanda	Mount_Glorious	Mitchelton	Oxenford	Canungra	Lamington	Halfway_Creek	Cresent_Head	Elizabeth_Beach	Hunter_Valley	Raymond_Terrace	Black_Hill	Jilliby	Illawara	Gerroa	Tabourie_Lake	Tilba	Cooma	Eden		South_Africa	Australia
Sample	Pop	Se116		Se-136		Se-138		Se-176(a)		Se-194		Se-208		Se-220
1	Vryheid	430	447	324	324	182	182	235	241	347	347	363	364	157	161
2	Vryheid	447	453	325	325	192	196	230	230	350	350	345	352	159	159
3	Vryheid	418	447	338	338	204	204	239	262	346	352	351	353	169	169
4	Vryheid	447	447	326	339	200	206	230	237	350	350	352	359	157	157
5	Vryheid	418	447	320	320	202	204	227	241	346	346	351	359	158	158
6	Vryheid	447	447	313	313	204	206	241	285	0	0	354	359	157	157
7	Vryheid	445	447	0	0	164	202	230	241	0	0	353	354	157	157
8	Vryheid	447	447	325	337	196	212	230	241	350	350	343	363	169	169
9	Vryheid	447	447	325	325	194	198	230	237	346	350	352	353	159	159
10	Vryheid	442	447	323	333	190	204	237	241	345	346	343	361	159	163
11	Vryheid	442	447	323	333	190	204	237	241	345	346	343	361	159	163
12	Vryheid	447	461	336	336	196	198	230	279	345	346	347	347	157	157
13	Vryheid	447	447	320	320	196	202	241	262	346	346	353	359	158	158
14	Vryheid	430	445	324	339	196	196	237	241	346	346	340	359	159	159
15	Vryheid	433	433	334	376	196	216	239	241	346	347	347	347	158	158
16	Vryheid	445	447	326	342	196	200	230	237	346	346	357	359	158	158
17	Vryheid	430	445	332	342	198	198	230	241	347	350	358	358	161	161
18	Vryheid	430	453	320	320	194	216	230	260	346	346	351	351	161	161
19	Vryheid	418	447	0	0	200	200	230	230	350	352	342	342	158	158
20	Vryheid	461	461	358	372	198	208	230	262	347	347	351	370	157	161
21	Denny_Dalton	430	450	325	383	170	190	230	230	354	354	351	351	161	161
22	Denny_Dalton	433	461	336	336	194	208	239	281	346	346	0	0	157	157
23	Denny_Dalton	430	430	335	385	192	200	230	239	345	354	343	347	161	161
24	Denny_Dalton	445	447	341	342	204	214	230	275	346	354	362	368	157	157
25	Denny_Dalton	430	433	329	334	200	200	260	283	350	350	348	351	157	169
26	Denny_Dalton	433	447	327	374	164	216	227	230	345	346	384	386	161	161
27	Denny_Dalton	430	464	327	327	200	200	230	230	345	345	384	386	161	161
28	Denny_Dalton	450	450	369	369	188	196	230	230	350	350	372	372	159	161
29	Denny_Dalton	0	0	0	0	196	210	241	273	345	345	0	0	157	157
30	Denny_Dalton	447	453	315	334	198	200	277	277	345	345	372	386	159	159
31	Denny_Dalton	445	450	334	334	200	216	241	241	345	350	0	0	161	161
32	Denny_Dalton	450	461	323	325	200	202	230	277	350	350	347	347	161	161
33	Denny_Dalton	418	464	319	331	202	206	230	254	345	345	0	0	159	159
34	Denny_Dalton	447	461	323	325	200	202	230	241	345	350	359	386	159	161
35	Denny_Dalton	447	464	325	334	198	204	277	277	350	350	344	363	161	161
36	Denny_Dalton	430	445	370	370	192	214	230	260	350	354	344	374	169	169
37	Denny_Dalton	418	433	0	0	200	204	230	230	346	346	347	351	159	161
38	Denny_Dalton	430	450	315	315	192	192	230	230	350	354	351	372	161	161
39	Denny_Dalton	430	450	327	327	188	190	230	237	350	354	351	351	161	161
40	Denny_Dalton	430	433	341	370	192	216	230	230	350	350	343	343	169	184
41	Ongoye	442	445	309	309	192	204	273	273	345	345	0	0	159	159
42	Ongoye	445	450	331	331	194	204	230	230	345	345	0	0	157	157
43	Ongoye	433	447	0	0	206	218	230	273	350	350	347	367	159	159
44	Ongoye	0	0	0	0	196	196	230	241	346	354	0	0	157	157
45	Ongoye	433	445	323	323	192	210	256	275	345	356	353	359	161	161
46	Ongoye	0	0	0	0	166	166	0	0	0	0	0	0	159	159
47	Ongoye	433	464	0	0	166	204	273	277	345	350	331	331	159	159
48	Ongoye	0	0	0	0	188	198	273	275	345	345	343	351	161	161
49	Ongoye	447	447	322	322	194	196	241	250	346	354	0	0	0	0
50	Ongoye	447	461	338	338	194	194	264	273	346	354	0	0	161	161
51	Ongoye	447	461	338	338	196	196	230	273	346	346	0	0	157	157
52	Ongoye	433	439	323	333	196	220	273	277	346	354	353	353	157	157
53	Ongoye	433	442	328	342	200	206	267	275	350	352	347	353	161	163
54	Ongoye	447	464	322	322	202	224	237	254	346	347	357	359	161	161
55	Ongoye	418	450	0	0	164	214	239	262	346	350	346	364	158	161
56	Ongoye	418	433	326	326	188	200	264	275	346	346	346	357	163	163
57	Ongoye	447	461	328	328	188	206	241	273	350	350	330	359	161	161
58	Ongoye	433	461	324	350	200	200	230	275	346	352	351	357	161	161
59	Ongoye	418	450	0	0	204	208	262	267	346	350	349	349	161	161
60	Ongoye	445	450	327	339	192	196	230	273	345	354	345	351	159	159
61	Tinley_Manor	447	447	0	0	184	186	241	241	350	350	357	357	161	163
62	Tinley_Manor	0	0	0	0	200	204	230	230	345	345	351	355	161	161
63	Tinley_Manor	0	0	0	0	190	208	0	0	0	0	0	0	159	161
64	Tinley_Manor	447	447	337	337	216	218	241	241	345	350	344	344	161	161
65	Tinley_Manor	430	430	326	328	190	192	230	241	0	0	355	355	161	190
66	Tinley_Manor	433	447	332	332	196	196	230	254	346	346	352	360	159	169
67	Tinley_Manor	436	447	326	326	194	202	230	260	346	354	359	359	157	157
68	Tinley_Manor	447	447	322	337	190	206	239	275	346	350	347	350	157	169
69	Tinley_Manor	415	446	0	0	202	210	260	264	347	347	349	351	161	163
70	Tinley_Manor	0	0	0	0	198	204	230	230	346	350	359	359	159	159
71	Tinley_Manor	442	450	325	333	0	0	237	237	350	356	349	349	169	169
72	Tinley_Manor	461	461	0	0	182	182	230	230	0	0	345	345	161	161
73	Tinley_Manor	0	0	0	0	166	166	241	250	350	350	0	0	157	190
74	Tinley_Manor	418	447	321	321	194	220	241	262	350	350	364	364	157	157
75	Tinley_Manor	0	0	0	0	202	206	227	250	345	350	0	0	157	157
76	Tinley_Manor	433	445	335	335	196	198	230	230	0	0	346	346	161	161
77	Tinley_Manor	433	445	318	318	184	196	254	254	352	352	368	368	159	159
78	Tinley_Manor	447	450	341	343	210	210	260	275	345	346	349	349	161	161
79	Tinley_Manor	418	447	365	367	206	206	230	237	346	350	353	370	161	161
80	Tinley_Manor	418	447	326	326	164	212	230	260	350	350	359	359	157	190
81	Pietermaritzburg	447	447	319	370	196	202	262	279	345	345	365	367	163	163
82	Pietermaritzburg	430	447	345	383	204	210	230	273	346	354	350	351	157	157
83	Pietermaritzburg	418	442	316	332	164	202	230	260	346	350	338	338	159	161
84	Pietermaritzburg	445	445	337	337	164	180	227	227	350	350	345	345	161	163
85	Pietermaritzburg	418	450	317	325	208	210	248	264	346	356	335	345	161	161
86	Pietermaritzburg	445	447	333	354	178	210	241	241	345	346	349	353	159	163
87	Pietermaritzburg	430	445	339	353	200	200	237	239	350	354	345	345	161	161
88	Pietermaritzburg	418	445	333	354	206	220	230	271	346	346	345	345	159	161
89	Pietermaritzburg	447	447	354	354	196	202	271	273	347	347	346	351	159	163
90	Pietermaritzburg	418	418	330	332	208	220	230	260	346	346	337	353	159	161
91	Pietermaritzburg	433	445	323	354	0	0	239	273	346	346	348	348	161	163
92	Pietermaritzburg	447	461	383	385	200	202	237	239	346	350	345	345	157	163
93	Pietermaritzburg	447	447	354	374	204	206	230	237	350	350	342	342	161	161
94	Pietermaritzburg	447	447	342	342	194	210	237	264	346	350	324	360	159	161
95	Pietermaritzburg	418	447	378	383	214	218	230	241	350	350	345	365	161	161
96	Pietermaritzburg	418	447	354	378	202	210	237	241	350	350	353	365	163	190
97	Pietermaritzburg	461	469	334	342	164	208	267	281	346	346	351	387	158	161
98	Pietermaritzburg	447	447	342	342	218	220	230	230	347	350	346	365	161	161
99	Pietermaritzburg	447	461	370	378	208	210	241	262	350	350	346	346	163	163
100	Pietermaritzburg	418	464	331	331	202	206	241	271	345	345	348	357	161	161
101	Summerveld	445	447	378	380	164	192	250	264	350	350	337	337	161	182
102	Summerveld	418	445	341	342	190	206	230	237	345	350	345	345	157	161
103	Summerveld	418	430	353	353	180	198	237	252	345	345	329	329	161	161
104	Summerveld	433	445	351	387	198	202	230	237	345	345	356	368	165	165
105	Summerveld	0	0	325	325	0	0	230	237	350	350	353	353	161	161
106	Summerveld	447	466	329	342	164	198	230	235	350	350	0	0	159	159
107	Summerveld	447	447	334	334	164	202	237	258	356	356	333	368	161	161
108	Summerveld	433	447	315	315	222	224	239	239	0	0	355	355	159	161
109	Summerveld	450	464	340	370	192	196	246	262	348	351	367	369	159	159
110	Summerveld	450	464	325	325	190	214	230	230	350	354	341	353	159	169
111	Summerveld	442	445	341	363	196	208	230	258	346	350	350	374	163	163
112	Summerveld	430	447	338	376	178	210	230	250	346	346	347	361	163	182
113	Summerveld	0	0	353	353	206	206	230	237	345	356	345	345	157	182
114	Summerveld	433	445	320	320	164	192	237	250	350	350	347	351	161	161
115	Summerveld	418	477	345	345	192	200	230	260	350	350	346	368	157	161
116	Summerveld	430	447	313	334	0	0	237	250	346	346	355	368	161	161
117	Summerveld	430	450	342	344	192	200	230	237	347	350	344	344	159	163
118	Summerveld	418	447	0	0	190	202	230	230	346	346	376	376	159	159
119	Summerveld	433	464	363	363	200	200	230	269	346	346	338	338	159	159
120	Summerveld	446	447	342	342	200	210	277	283	346	350	360	360	161	161
121	Durban	430	436	329	329	202	208	230	239	350	350	359	359	157	169
122	Durban	0	0	335	337	196	198	277	277	345	350	359	359	158	158
123	Durban	431	464	323	344	202	208	239	239	350	350	349	349	159	159
124	Durban	433	461	325	374	196	198	254	275	345	350	357	363	169	169
125	Durban	418	447	369	371	198	204	241	262	345	345	376	376	161	169
126	Durban	447	450	367	367	164	212	230	239	345	350	374	376	161	161
127	Durban	447	461	327	327	164	196	230	237	350	352	361	361	161	161
128	Durban	447	450	359	367	188	190	230	258	345	350	368	368	157	169
129	Durban	447	447	321	339	198	200	230	230	352	352	0	0	158	158
130	Durban	445	447	357	361	192	192	230	258	350	350	0	0	157	169
131	Durban	418	447	339	378	184	200	230	267	350	352	351	351	158	161
132	Durban	458	461	335	348	194	202	233	239	345	350	349	372	161	161
133	Durban	418	447	321	341	196	202	246	258	345	354	362	370	159	161
134	Durban	436	447	333	341	198	208	230	252	345	350	341	341	157	169
135	Durban	433	464	326	344	198	198	254	254	350	350	344	359	161	161
136	Durban	447	447	342	342	200	224	230	252	352	352	365	365	161	161
137	Durban	450	450	369	369	208	208	227	230	345	345	0	0	159	169
138	Durban	453	453	369	369	198	214	227	254	352	352	0	0	159	161
139	Durban	418	447	329	329	220	220	254	254	350	350	341	341	159	163
140	Durban	436	447	0	0	220	220	227	237	345	350	341	343	161	161
141	Richmond	433	450	0	0	164	192	230	237	350	356	357	398	163	163
142	Richmond	445	450	0	0	192	198	230	269	347	347	351	398	159	159
143	Richmond	447	447	327	356	216	218	230	241	345	345	376	376	157	161
144	Richmond	418	442	0	0	194	202	230	258	346	346	335	351	161	161
145	Richmond	433	461	0	0	196	202	230	239	350	350	384	386	159	159
146	Richmond	446	447	330	332	192	196	237	275	346	346	340	340	161	161
147	Richmond	418	466	337	339	194	200	227	230	356	356	0	0	157	161
148	Richmond	433	450	365	365	186	218	230	275	346	350	340	359	161	161
149	Richmond	442	445	340	342	216	218	258	269	0	0	336	340	161	161
150	Richmond	418	450	347	356	194	204	267	279	345	345	332	336	161	161
151	Richmond	418	445	0	0	192	196	230	241	346	346	378	380	159	159
152	Richmond	447	447	328	328	164	196	230	260	346	346	355	355	161	161
153	Richmond	447	450	342	370	196	202	267	275	0	0	0	0	167	167
154	Richmond	418	418	347	380	194	202	230	230	346	346	0	0	159	159
155	Richmond	430	464	331	350	196	216	230	241	345	345	353	386	161	161
156	Richmond	447	453	0	0	202	206	260	275	345	350	347	353	161	161
157	Richmond	447	461	341	348	198	202	230	260	350	350	0	0	171	171
158	Richmond	0	0	0	0	164	198	230	271	345	346	0	0	159	159
159	Richmond	433	450	345	374	196	208	230	243	345	346	339	343	157	161
160	Pennington	450	461	325	339	204	204	260	285	345	345	347	370	161	161
161	Pennington	436	445	325	325	190	200	227	227	345	345	365	367	158	158
162	Pennington	447	461	325	327	202	204	239	260	350	350	347	380	163	163
163	Pennington	445	445	0	0	198	202	260	279	0	0	351	367	158	158
164	Pennington	0	0	0	0	190	202	230	260	345	345	351	367	158	158
165	Pennington	447	466	350	383	198	212	239	250	345	345	0	0	161	161
166	Pennington	445	445	0	0	200	202	260	279	0	0	351	367	158	158
167	Pennington	447	450	327	336	202	212	230	239	346	350	350	370	161	161
168	Pennington	450	461	331	333	188	212	239	239	345	350	347	370	163	163
169	Pennington	436	447	329	329	0	0	269	273	345	345	355	370	161	161
170	Pennington	447	450	0	0	194	224	267	277	345	345	361	361	159	159
171	Pennington	447	453	325	341	176	176	230	264	345	345	370	394	157	157
172	Pennington	433	436	0	0	164	204	230	260	345	345	341	374	161	161
173	Pennington	445	461	329	329	202	202	227	239	350	350	378	380	157	157
174	Pennington	442	450	339	352	198	202	250	260	0	0	366	370	158	161
175	Pennington	0	0	0	0	200	204	275	287	350	350	343	343	158	192
176	Pennington	450	461	325	339	204	206	260	260	345	345	347	370	161	163
177	Pennington	430	450	331	342	204	206	227	227	350	350	350	370	158	158
178	Pennington	418	450	327	370	204	204	227	227	350	350	372	374	161	161
179	Pennington	0	0	327	361	186	204	230	273	345	345	335	370	161	161
180	Port_Edward	0	0	0	0	192	210	252	267	345	345	0	0	161	161
181	Port_Edward	446	447	334	352	212	212	246	277	345	354	376	378	167	196
182	Port_Edward	418	447	352	352	200	214	246	264	350	350	308	362	159	161
183	Port_Edward	0	0	384	384	202	218	230	241	0	0	0	0	159	159
184	Port_Edward	418	430	334	334	180	180	260	267	350	350	348	348	161	161
185	Port_Edward	447	447	384	384	218	222	227	241	0	0	308	308	161	161
186	Port_Edward	0	0	0	0	182	226	230	267	350	354	355	355	161	161
187	Port_Edward	0	0	323	323	182	202	230	254	354	354	0	0	159	161
188	Port_Edward	430	430	323	323	182	204	227	230	345	345	353	394	158	161
189	Port_Edward	447	447	0	0	202	206	230	260	345	350	357	357	158	158
190	Port_Edward	446	453	381	381	202	202	230	260	345	356	357	357	161	163
191	Port_Edward	450	453	342	342	202	212	239	279	345	350	347	353	159	159
192	Port_Edward	418	445	301	301	194	218	230	239	350	350	331	331	165	165
193	Port_Edward	430	450	382	384	210	212	239	241	345	345	345	349	159	190
194	Port_Edward	418	447	0	0	188	196	239	254	350	350	341	341	169	169
195	Port_Edward	447	461	331	396	220	222	230	246	345	345	337	337	157	190
196	Port_Edward	447	466	348	350	192	200	239	252	345	350	349	349	157	157
197	Port_Edward	430	445	323	341	186	218	273	275	350	350	0	0	161	161
198	Port_Edward	0	0	301	301	196	214	230	279	350	352	0	0	159	159
199	Boesmansriviermond	423	423	347	347	174	200	248	254	345	345	0	0	157	157
200	Boesmansriviermond	415	415	0	0	202	210	230	254	345	345	0	0	163	165
201	Boesmansriviermond	0	0	0	0	184	184	233	239	0	0	0	0	154	214
202	Boesmansriviermond	415	415	0	0	188	194	233	243	345	345	382	384	157	157
203	Boesmansriviermond	423	427	347	347	0	0	0	0	345	346	382	384	154	154
204	Boesmansriviermond	423	433	0	0	0	0	0	0	345	345	0	0	157	157
205	Boesmansriviermond	423	433	0	0	192	192	233	237	345	345	0	0	157	157
206	Boesmansriviermond	423	423	0	0	196	202	230	230	345	345	0	0	157	157
207	Boesmansriviermond	423	423	0	0	192	196	230	230	345	345	389	392	157	157
208	Boesmansriviermond	423	442	353	353	0	0	230	239	0	0	0	0	157	157
209	Boesmansriviermond	447	458	0	0	0	0	230	239	345	345	340	368	154	154
210	Boesmansriviermond	0	0	367	369	0	0	0	0	0	0	358	358	0	0
211	Boesmansriviermond	0	0	0	0	0	0	230	239	345	345	387	389	154	163
212	Boesmansriviermond	423	427	0	0	190	216	243	243	345	345	386	386	154	159
213	Boesmansriviermond	415	423	0	0	190	216	230	241	345	345	0	0	163	196
214	Boesmansriviermond	0	0	0	0	190	190	233	237	345	345	339	339	154	154
215	Boesmansriviermond	0	0	0	0	192	194	233	239	345	345	352	352	157	159
216	Boesmansriviermond	423	450	0	0	176	186	230	230	345	345	0	0	161	163
217	Boesmansriviermond	0	0	0	0	192	206	230	260	345	345	350	350	157	163
218	Boesmansriviermond	0	0	0	0	184	194	227	230	345	345	0	0	157	194
219	Herberton	453	466	0	0	182	182	258	267	350	350	0	0	157	157
220	Herberton	0	0	0	0	190	206	267	275	345	345	0	0	158	158
221	Herberton	466	466	365	365	182	182	267	267	350	350	0	0	157	157
222	Herberton	0	0	365	365	182	190	267	267	0	0	308	308	158	158
223	Herberton	450	466	339	339	190	190	267	275	350	350	359	361	157	157
224	Herberton	0	0	0	0	182	208	243	264	345	345	335	361	158	158
225	Herberton	0	0	356	356	190	192	230	258	0	0	335	361	0	0
226	Herberton	0	0	339	339	182	190	258	258	345	350	335	358	158	158
227	Herberton	0	0	0	0	182	194	267	267	0	0	357	361	0	0
228	Herberton	445	445	0	0	190	206	267	267	0	0	308	355	0	0
229	Herberton	447	466	0	0	182	190	239	258	350	350	0	0	158	158
230	Herberton	466	466	356	356	194	208	267	267	350	350	0	0	158	158
231	Herberton	445	450	365	365	184	184	269	269	350	350	355	361	0	0
232	Herberton	0	0	0	0	190	208	243	267	0	0	0	0	0	0
233	Herberton	466	466	0	0	188	190	267	267	350	350	0	0	158	158
234	Herberton	445	445	0	0	208	208	267	267	346	346	357	363	157	157
235	Herberton	445	453	0	0	206	208	267	267	0	0	356	361	158	158
236	Herberton	0	0	356	356	190	198	267	267	0	0	0	0	157	206
237	Herberton	0	0	329	329	182	194	230	267	0	0	358	358	158	158
238	Herberton	0	0	0	0	192	206	230	267	0	0	0	0	158	158
239	Malanda	418	466	365	365	200	200	230	260	345	350	355	365	159	159
240	Malanda	418	418	331	367	200	216	239	241	345	354	0	0	0	0
241	Malanda	418	445	0	0	200	204	239	241	0	0	363	365	158	158
242	Malanda	418	445	341	379	200	204	239	267	0	0	359	364	158	167
243	Malanda	418	445	0	0	204	208	239	260	345	345	355	355	159	159
244	Malanda	418	418	0	0	194	200	239	267	350	350	355	361	158	159
245	Malanda	418	466	341	341	204	204	230	239	350	354	351	351	0	0
246	Malanda	418	418	0	0	200	200	230	260	345	350	355	355	159	159
247	Malanda	418	445	0	0	204	208	239	260	345	345	0	0	0	0
248	Malanda	418	418	0	0	200	200	267	267	345	354	355	364	0	0
249	Malanda	418	466	0	0	194	200	260	273	345	350	359	359	0	0
250	Malanda	418	466	339	339	200	200	241	252	350	354	351	351	159	159
251	Malanda	0	0	379	379	198	208	264	267	0	0	359	359	0	0
252	Malanda	418	418	0	0	194	194	230	239	345	354	363	365	158	158
253	Malanda	418	446	0	0	206	218	239	269	346	354	365	365	159	159
254	Malanda	418	445	379	379	196	200	239	267	345	345	355	358	0	0
255	Mount_Glorious	0	0	341	341	190	196	267	267	346	346	357	357	159	159
256	Mount_Glorious	445	453	365	367	204	210	267	269	0	0	342	358	158	158
257	Mount_Glorious	445	445	0	0	190	194	239	267	0	0	357	359	159	159
258	Mount_Glorious	442	445	367	369	182	190	267	267	347	347	309	363	159	159
259	Mount_Glorious	0	0	0	0	190	208	239	267	0	0	359	361	158	158
260	Mount_Glorious	0	0	0	0	190	208	262	264	0	0	356	363	158	158
261	Mount_Glorious	0	0	367	367	190	208	239	258	345	345	356	356	154	157
262	Mount_Glorious	0	0	0	0	190	208	262	262	350	350	356	358	157	157
263	Mount_Glorious	445	466	341	341	190	194	239	262	350	350	356	358	158	158
264	Mount_Glorious	445	445	341	341	190	208	262	267	350	350	356	363	157	157
265	Mount_Glorious	0	0	0	0	190	208	239	262	0	0	356	363	158	158
266	Mount_Glorious	0	0	0	0	190	190	267	267	0	0	361	367	158	158
267	Mount_Glorious	0	0	393	395	190	208	262	262	350	350	356	363	158	158
268	Mount_Glorious	0	0	341	393	190	194	239	267	350	350	356	363	158	158
269	Mount_Glorious	0	0	341	395	190	208	239	262	0	0	361	363	158	158
270	Mount_Glorious	0	0	341	395	190	208	239	267	350	350	356	358	157	157
271	Mount_Glorious	0	0	393	395	190	194	262	267	350	350	358	361	158	158
272	Mount_Glorious	0	0	391	393	190	194	239	267	350	350	356	358	157	157
273	Mount_Glorious	0	0	391	393	190	208	262	262	346	346	356	363	158	158
274	Mount_Glorious	0	0	341	393	190	210	262	262	0	0	356	358	158	158
275	Mitchelton	0	0	339	393	182	208	258	258	350	350	356	360	157	157
276	Mitchelton	0	0	329	393	192	210	264	267	346	346	354	356	157	157
277	Mitchelton	0	0	376	391	182	192	267	267	345	345	358	360	157	157
278	Mitchelton	0	0	0	0	182	182	267	267	0	0	0	0	157	157
279	Mitchelton	445	445	0	0	182	206	267	267	0	0	354	356	157	157
280	Mitchelton	0	0	389	389	182	206	267	267	0	0	356	358	157	157
281	Mitchelton	0	0	376	385	182	192	230	230	350	350	363	363	158	158
282	Mitchelton	0	0	389	389	182	194	267	267	0	0	354	360	154	157
283	Mitchelton	0	0	0	0	182	194	0	0	0	0	0	0	158	158
284	Mitchelton	445	466	356	356	192	192	230	267	350	350	361	363	157	157
285	Mitchelton	445	445	0	0	190	208	264	267	346	346	354	356	157	157
286	Mitchelton	445	445	0	0	190	208	264	267	345	345	356	361	157	157
287	Mitchelton	445	445	0	0	182	206	267	267	0	0	356	358	157	157
288	Mitchelton	423	445	341	341	206	206	267	267	0	0	354	358	157	157
289	Mitchelton	418	466	0	0	182	182	252	267	346	350	0	0	157	157
290	Mitchelton	0	0	0	0	182	198	0	0	0	0	0	0	159	159
291	Mitchelton	0	0	0	0	186	198	0	0	0	0	359	361	159	159
292	Mitchelton	0	0	0	0	182	192	230	267	0	0	354	361	157	157
293	Mitchelton	0	0	0	0	190	192	258	258	0	0	361	363	157	157
294	Oxenford	445	445	0	0	190	208	230	230	345	345	0	0	158	158
295	Oxenford	445	466	0	0	198	208	258	267	350	350	0	0	157	157
296	Oxenford	445	445	0	0	190	190	239	267	0	0	0	0	158	158
297	Oxenford	0	0	0	0	190	190	267	267	345	345	0	0	158	159
298	Oxenford	418	445	329	339	188	194	262	267	345	345	359	361	157	157
299	Oxenford	418	445	339	339	190	192	267	267	345	350	353	353	158	186
300	Oxenford	445	445	369	369	182	190	241	258	346	346	356	360	157	157
301	Oxenford	442	445	339	339	190	190	239	267	0	0	354	360	158	158
302	Oxenford	466	466	329	329	190	194	267	267	350	350	356	356	158	158
303	Oxenford	445	466	329	329	190	192	267	267	346	350	356	361	158	158
304	Oxenford	445	466	0	0	190	190	239	239	350	350	361	361	158	206
305	Oxenford	445	445	0	0	190	192	262	267	0	0	359	359	157	157
306	Oxenford	0	0	0	0	190	194	230	267	350	350	0	0	158	158
307	Oxenford	445	466	339	339	182	190	239	275	346	346	355	356	158	158
308	Oxenford	453	466	329	329	190	198	262	267	350	350	356	357	157	157
309	Oxenford	453	466	339	339	190	190	267	267	350	350	356	356	158	190
310	Oxenford	445	453	365	365	190	190	239	267	345	345	356	356	158	190
311	Oxenford	445	445	0	0	190	210	230	239	0	0	356	360	157	157
312	Oxenford	445	466	339	339	190	208	260	267	350	350	355	361	158	206
313	Oxenford	453	456	0	0	208	210	267	267	346	346	361	361	158	158
314	Canungra	445	445	329	329	198	208	267	267	0	0	308	361	157	157
315	Canungra	0	0	0	0	204	208	267	271	350	350	323	335	157	157
316	Canungra	423	445	339	359	182	182	239	267	345	345	302	356	158	158
317	Canungra	418	466	0	0	192	210	267	267	350	350	360	360	158	158
318	Canungra	418	445	373	373	204	210	258	267	345	345	358	363	158	158
319	Canungra	453	453	341	341	182	208	267	267	346	346	355	367	158	158
320	Canungra	445	466	365	365	190	206	239	267	0	0	356	357	158	158
321	Canungra	445	445	0	0	190	190	239	258	345	345	347	355	158	158
322	Canungra	445	466	356	356	198	206	262	267	350	350	367	367	158	158
323	Canungra	0	0	339	339	182	200	262	267	345	350	367	367	158	159
324	Canungra	0	0	0	0	182	208	239	267	345	345	354	361	158	158
325	Canungra	0	0	0	0	182	190	258	285	0	0	358	361	157	157
326	Canungra	445	453	0	0	182	182	258	285	0	0	357	361	157	206
327	Canungra	445	466	356	356	182	182	264	267	350	350	367	367	158	158
328	Canungra	445	466	365	365	208	208	258	285	350	350	357	358	157	157
329	Canungra	0	0	0	0	182	198	267	285	350	350	0	0	158	158
330	Canungra	466	466	356	356	182	198	230	267	350	350	302	356	158	158
331	Canungra	0	0	356	356	182	198	267	267	350	350	356	365	158	158
332	Canungra	445	445	356	356	182	208	267	267	350	350	356	367	158	158
333	Canungra	423	445	356	356	182	188	267	267	346	346	356	356	158	159
334	Lamington	418	469	0	0	204	208	239	267	345	350	354	356	157	157
335	Lamington	445	445	0	0	186	210	246	267	350	350	308	354	157	157
336	Lamington	427	445	327	329	190	208	267	267	345	345	354	356	157	157
337	Lamington	445	469	339	339	182	182	246	246	350	350	308	308	157	157
338	Lamington	418	469	327	327	194	208	243	267	350	350	308	354	158	158
339	Lamington	418	466	0	0	188	194	239	267	345	350	356	356	154	157
340	Lamington	445	466	327	327	188	208	239	267	350	350	354	354	157	157
341	Lamington	445	445	329	329	188	188	243	243	350	350	352	356	158	158
342	Lamington	445	466	0	0	182	208	267	267	350	350	356	356	158	158
343	Lamington	453	466	327	327	182	208	264	267	350	350	356	358	158	158
344	Lamington	445	445	327	327	182	194	264	267	0	0	354	355	158	158
345	Lamington	466	469	0	0	188	208	264	267	350	350	354	354	154	157
346	Lamington	466	469	0	0	188	208	264	267	0	0	354	355	154	157
347	Lamington	453	453	0	0	188	190	239	267	0	0	355	355	158	206
348	Lamington	445	469	0	0	182	208	246	264	350	350	352	352	154	154
349	Lamington	445	445	327	331	182	188	243	264	0	0	356	356	158	158
350	Lamington	445	445	365	365	182	188	239	258	0	0	354	354	157	186
351	Lamington	445	453	0	0	182	210	243	267	0	0	351	352	158	158
352	Lamington	418	453	0	0	194	208	267	267	0	0	354	354	154	157
353	Lamington	466	469	365	378	182	188	246	267	350	350	359	359	158	158
354	Halfway_Creek	0	0	365	365	194	194	267	267	346	346	353	361	159	159
355	Halfway_Creek	445	456	365	365	190	192	239	267	346	346	356	356	158	206
356	Halfway_Creek	453	453	318	318	194	196	239	267	346	347	356	356	158	206
357	Halfway_Creek	445	466	356	356	208	208	258	267	350	350	357	361	158	158
358	Halfway_Creek	0	0	0	0	190	196	262	267	346	346	357	361	157	206
359	Halfway_Creek	0	0	0	0	190	194	0	0	0	0	361	361	159	167
360	Halfway_Creek	0	0	391	391	208	210	239	258	345	346	355	361	158	158
361	Halfway_Creek	0	0	327	327	182	194	258	267	345	350	357	361	158	159
362	Halfway_Creek	0	0	327	363	190	194	267	267	346	346	361	361	167	167
363	Halfway_Creek	0	0	363	393	194	194	243	267	0	0	361	361	167	167
364	Halfway_Creek	0	0	0	0	190	196	258	267	350	350	351	360	158	161
365	Halfway_Creek	0	0	339	369	182	182	230	230	350	350	0	0	0	0
366	Halfway_Creek	0	0	0	0	194	208	262	267	346	346	346	358	159	159
367	Halfway_Creek	0	0	356	367	182	190	264	267	0	0	363	363	158	158
368	Halfway_Creek	0	0	391	395	182	198	267	267	0	0	364	364	158	158
369	Halfway_Creek	0	0	391	395	194	196	267	267	0	0	361	361	158	158
370	Halfway_Creek	0	0	389	391	208	208	239	262	346	346	346	358	158	158
371	Halfway_Creek	0	0	365	365	190	194	258	258	350	350	351	351	158	158
372	Halfway_Creek	0	0	367	385	194	196	267	267	0	0	361	361	158	158
373	Halfway_Creek	0	0	385	389	0	0	262	267	0	0	309	356	157	194
374	Cresent_Head	445	456	369	369	194	204	239	241	0	0	302	357	194	206
375	Cresent_Head	418	445	365	371	196	204	239	267	345	345	353	378	158	158
376	Cresent_Head	0	0	341	341	198	204	230	239	345	346	363	378	157	157
377	Cresent_Head	445	445	0	0	200	208	241	264	345	345	349	349	158	206
378	Cresent_Head	0	0	0	0	182	200	230	241	345	350	353	361	159	161
379	Cresent_Head	0	0	339	339	180	200	262	273	345	345	365	365	159	186
380	Cresent_Head	0	0	0	0	194	200	264	267	345	345	348	363	180	194
381	Cresent_Head	430	430	365	365	194	200	239	262	346	346	352	361	159	159
382	Cresent_Head	430	431	365	365	194	202	241	241	345	345	308	355	159	206
383	Cresent_Head	418	431	339	339	194	200	239	241	345	345	339	352	159	161
384	Cresent_Head	418	456	0	0	196	208	264	281	345	346	361	361	158	161
385	Cresent_Head	430	430	359	359	194	210	230	264	345	345	361	380	158	158
386	Cresent_Head	418	445	0	0	198	206	239	246	350	350	354	363	159	161
387	Cresent_Head	0	0	365	365	208	208	230	239	0	0	358	358	158	194
388	Cresent_Head	0	0	333	335	204	204	239	277	345	345	364	364	161	161
389	Cresent_Head	418	418	341	341	194	202	239	239	345	350	358	358	159	180
390	Cresent_Head	418	445	367	367	182	208	239	264	345	345	308	359	158	159
391	Cresent_Head	418	430	333	341	182	202	239	241	345	345	356	356	159	194
392	Cresent_Head	0	0	373	373	194	208	241	256	350	350	355	355	158	194
393	Cresent_Head	453	453	341	341	200	200	267	277	345	345	382	382	158	180
394	Elizabeth_Beach	447	456	339	339	192	210	252	262	345	346	349	358	158	196
395	Elizabeth_Beach	436	445	381	381	192	204	239	239	345	345	355	361	158	158
396	Elizabeth_Beach	418	447	381	381	212	226	239	252	0	0	356	378	159	180
397	Elizabeth_Beach	445	445	341	341	200	208	252	269	345	345	363	363	161	206
398	Elizabeth_Beach	418	447	339	356	182	216	241	267	345	346	363	376	158	194
399	Elizabeth_Beach	445	445	359	359	206	208	230	269	345	345	308	345	194	194
400	Elizabeth_Beach	427	430	363	363	192	208	239	252	346	346	363	365	158	161
401	Elizabeth_Beach	418	453	365	374	182	206	239	239	345	345	380	380	158	161
402	Elizabeth_Beach	418	445	334	382	0	0	239	264	0	0	364	364	206	206
403	Elizabeth_Beach	445	453	341	341	198	212	239	267	345	345	361	363	158	196
404	Elizabeth_Beach	418	453	339	339	212	216	239	239	345	345	378	378	158	158
405	Elizabeth_Beach	418	445	0	0	208	220	239	258	345	345	355	355	158	158
406	Elizabeth_Beach	445	453	365	365	188	206	239	241	0	0	380	380	161	196
407	Elizabeth_Beach	418	445	317	359	206	210	264	281	345	345	345	380	161	161
408	Elizabeth_Beach	445	447	367	367	194	194	230	267	0	0	308	345	159	159
409	Elizabeth_Beach	418	445	341	341	212	220	239	267	345	345	355	363	158	158
410	Elizabeth_Beach	418	445	356	356	200	212	264	269	345	345	351	356	158	158
411	Elizabeth_Beach	445	445	381	381	200	226	239	264	345	346	353	356	158	180
412	Elizabeth_Beach	418	418	339	342	180	216	239	281	0	0	357	378	158	161
413	Elizabeth_Beach	418	418	341	359	190	208	230	264	0	0	357	357	158	159
414	Hunter_Valley	447	453	339	339	194	194	230	241	350	350	349	363	158	180
415	Hunter_Valley	418	447	361	361	196	206	246	269	345	345	308	358	180	194
416	Hunter_Valley	418	456	359	365	184	194	239	264	350	350	355	361	159	159
417	Hunter_Valley	450	461	339	365	196	210	230	239	0	0	361	361	159	161
418	Hunter_Valley	418	445	373	373	208	220	239	241	345	350	363	363	161	161
419	Hunter_Valley	0	0	0	0	194	196	230	264	350	350	359	359	158	194
420	Hunter_Valley	418	418	361	361	182	186	230	269	345	345	349	356	158	194
421	Hunter_Valley	418	446	356	356	202	204	239	239	345	345	357	363	158	180
422	Hunter_Valley	445	447	339	359	200	208	239	239	345	350	353	380	158	158
423	Hunter_Valley	418	447	317	359	204	208	239	264	345	354	347	351	159	180
424	Hunter_Valley	418	427	0	0	184	212	239	239	345	345	361	378	158	161
425	Hunter_Valley	418	418	373	373	200	200	239	241	346	346	351	356	158	180
426	Hunter_Valley	445	445	365	365	204	206	239	267	345	345	347	347	159	180
427	Hunter_Valley	0	0	341	341	194	204	264	267	0	0	364	364	180	206
428	Hunter_Valley	0	0	341	371	194	194	241	241	345	345	361	361	158	180
429	Hunter_Valley	430	453	350	359	194	196	239	239	345	345	349	356	159	180
430	Hunter_Valley	445	446	341	342	184	194	239	258	345	346	308	353	158	186
431	Hunter_Valley	418	456	356	367	204	204	230	241	345	345	356	356	154	159
432	Hunter_Valley	418	447	375	375	200	204	241	264	345	345	357	361	158	194
433	Hunter_Valley	418	445	0	0	194	200	230	241	345	345	353	353	158	159
434	Raymond_Terrace	0	0	359	359	192	204	230	239	346	346	309	359	158	158
435	Raymond_Terrace	0	0	389	395	200	210	241	241	347	350	309	362	158	180
436	Raymond_Terrace	0	0	318	318	196	208	239	239	346	346	366	366	167	180
437	Raymond_Terrace	0	0	339	341	184	194	230	230	346	346	353	353	167	180
438	Raymond_Terrace	0	0	341	367	194	196	230	258	346	346	361	363	158	158
439	Raymond_Terrace	0	0	339	389	196	212	230	230	0	0	361	363	158	194
440	Raymond_Terrace	0	0	341	356	194	208	239	241	346	350	355	364	180	186
441	Raymond_Terrace	0	0	359	363	204	204	230	239	346	346	347	356	158	158
442	Raymond_Terrace	0	0	385	393	194	194	230	246	0	0	352	352	158	194
443	Raymond_Terrace	0	0	341	341	200	200	246	264	350	350	356	356	159	161
444	Raymond_Terrace	0	0	341	402	194	194	230	230	345	350	364	364	159	194
445	Raymond_Terrace	0	0	359	389	188	208	243	258	345	345	357	361	157	161
446	Raymond_Terrace	0	0	391	397	186	194	230	260	345	345	345	361	158	194
447	Raymond_Terrace	0	0	341	393	214	216	241	252	345	345	343	349	158	159
448	Raymond_Terrace	0	0	359	367	184	204	267	275	345	345	358	364	158	180
449	Raymond_Terrace	0	0	379	389	192	208	264	281	346	350	357	361	0	0
450	Raymond_Terrace	0	0	393	402	200	200	230	239	346	354	378	380	167	206
451	Raymond_Terrace	0	0	365	365	194	194	239	239	346	350	354	356	158	186
452	Raymond_Terrace	0	0	341	395	194	208	241	264	346	346	357	359	158	158
453	Raymond_Terrace	0	0	339	383	208	212	243	252	346	346	355	355	158	161
454	Black_Hill	418	446	359	359	196	196	239	256	345	345	355	355	158	194
455	Black_Hill	445	466	356	363	208	208	241	267	0	0	358	386	159	161
456	Black_Hill	418	445	341	359	194	204	239	241	346	346	361	361	167	194
457	Black_Hill	418	418	359	359	184	196	230	252	0	0	351	357	158	161
458	Black_Hill	418	418	341	341	192	196	264	275	0	0	345	361	158	161
459	Black_Hill	418	445	317	341	196	196	241	267	345	345	355	363	194	194
460	Black_Hill	418	445	363	363	210	210	230	241	346	346	353	357	161	161
461	Black_Hill	445	456	0	0	194	204	243	246	345	354	349	353	158	158
462	Black_Hill	418	418	339	359	194	208	239	241	350	350	349	363	167	186
463	Black_Hill	418	456	359	359	194	196	230	230	346	346	355	387	167	194
464	Black_Hill	418	418	341	373	196	210	230	264	345	345	356	356	158	158
465	Black_Hill	446	466	356	373	196	198	273	281	0	0	355	357	158	194
466	Black_Hill	445	446	359	374	194	200	241	277	0	0	364	364	161	161
467	Black_Hill	447	469	359	359	198	210	239	239	350	350	353	359	161	194
468	Black_Hill	418	445	385	389	194	204	239	239	345	345	308	353	157	180
469	Black_Hill	445	466	356	359	194	194	239	264	346	346	345	345	194	206
470	Black_Hill	418	418	356	359	182	200	230	264	345	345	345	364	158	194
471	Black_Hill	446	453	339	361	194	204	241	241	345	345	353	353	194	206
472	Black_Hill	423	445	317	359	194	204	230	241	0	0	378	378	167	200
473	Black_Hill	0	0	342	359	196	204	241	267	0	0	353	353	158	158
474	Jilliby	418	445	0	0	196	210	239	264	345	345	0	0	158	161
475	Jilliby	418	445	0	0	200	200	230	262	345	345	0	0	158	158
476	Jilliby	430	447	0	0	200	210	239	239	346	346	0	0	157	180
477	Jilliby	445	456	0	0	200	200	260	260	350	350	0	0	158	161
478	Jilliby	418	445	331	365	200	202	264	269	0	0	0	0	158	158
479	Jilliby	445	466	363	381	200	204	239	264	345	345	0	0	180	206
480	Jilliby	418	453	375	375	196	210	260	264	0	0	0	0	159	161
481	Jilliby	0	0	0	0	194	208	262	262	346	346	0	0	157	194
482	Jilliby	418	445	0	0	196	202	239	241	345	345	0	0	167	167
483	Jilliby	427	445	359	359	188	188	239	241	354	354	0	0	158	158
484	Jilliby	418	445	0	0	200	210	241	267	345	345	0	0	0	0
485	Jilliby	418	461	0	0	202	210	264	264	346	350	0	0	154	154
486	Jilliby	418	418	0	0	196	208	239	241	345	345	0	0	158	158
487	Jilliby	0	0	0	0	194	194	230	273	0	0	0	0	0	0
488	Jilliby	418	430	0	0	194	212	230	239	350	354	0	0	154	206
489	Jilliby	418	430	0	0	192	204	239	262	345	345	0	0	161	194
490	Jilliby	418	430	0	0	208	210	239	239	345	345	0	0	158	158
491	Jilliby	418	466	365	365	194	202	239	264	345	350	0	0	158	158
492	Jilliby	418	418	317	317	200	204	239	239	345	350	0	0	157	206
493	Jilliby	418	466	365	365	200	214	269	277	0	0	0	0	159	159
494	Illawara	418	447	361	361	208	208	267	269	345	345	347	355	158	194
495	Illawara	446	456	341	361	190	194	241	241	0	0	355	363	158	158
496	Illawara	418	427	360	360	210	210	258	267	346	354	358	358	158	194
497	Illawara	430	445	341	359	204	214	241	246	0	0	355	355	158	161
498	Illawara	418	418	361	365	200	204	239	239	0	0	0	0	158	194
499	Illawara	447	453	341	341	194	206	241	267	345	345	353	353	167	167
500	Illawara	430	469	359	359	194	198	230	241	346	346	357	357	158	158
501	Illawara	418	445	341	359	194	204	239	267	0	0	363	363	186	194
502	Illawara	447	453	339	341	194	194	241	241	345	345	353	356	194	194
503	Illawara	418	447	0	0	206	208	230	241	345	345	353	356	167	194
504	Illawara	0	0	359	359	208	208	230	239	345	354	355	384	194	194
505	Illawara	418	447	341	341	202	204	239	267	345	345	362	386	186	194
506	Illawara	418	436	341	341	194	210	230	241	345	345	363	363	158	158
507	Illawara	418	418	359	359	198	204	230	239	345	345	353	356	161	186
508	Illawara	418	446	341	373	204	204	230	241	345	350	355	355	194	198
509	Illawara	418	418	0	0	212	214	241	241	345	345	355	384	159	202
510	Illawara	418	447	361	361	198	202	230	239	345	345	355	355	158	158
511	Illawara	0	0	341	359	198	208	239	239	345	345	355	355	158	161
512	Illawara	418	418	341	341	208	208	241	241	345	345	347	353	161	161
513	Illawara	0	0	317	317	204	206	230	269	345	345	355	361	159	186
514	Gerroa	418	445	341	341	194	194	258	285	0	0	349	349	161	206
515	Gerroa	418	418	317	359	182	194	239	258	345	350	355	360	161	180
516	Gerroa	418	466	369	369	196	208	239	239	346	346	359	359	159	161
517	Gerroa	436	445	359	359	196	196	239	239	346	350	0	0	161	206
518	Gerroa	439	466	361	361	194	200	230	250	345	346	0	0	158	158
519	Gerroa	0	0	0	0	0	0	0	0	350	350	0	0	157	206
520	Gerroa	446	446	0	0	194	194	230	230	345	354	366	366	158	180
521	Gerroa	0	0	373	373	194	194	230	258	0	0	361	363	161	161
522	Gerroa	418	445	347	347	194	200	230	230	345	345	361	361	180	186
523	Gerroa	445	466	378	385	182	216	230	230	345	345	367	378	186	206
524	Gerroa	431	456	0	0	198	200	258	258	350	350	349	363	159	180
525	Gerroa	436	447	317	317	204	206	264	285	345	345	355	356	159	186
526	Gerroa	418	445	367	367	200	200	252	258	345	345	356	356	206	206
527	Gerroa	445	445	339	361	184	200	230	258	0	0	308	308	161	194
528	Gerroa	0	0	341	341	200	200	241	258	0	0	0	0	161	194
529	Gerroa	466	466	365	367	182	204	239	241	350	350	333	335	158	158
530	Gerroa	445	466	341	341	184	216	230	252	350	350	0	0	159	186
531	Gerroa	445	447	341	341	202	218	269	283	346	356	363	363	186	206
532	Gerroa	418	446	361	361	194	216	246	258	346	346	349	359	158	159
533	Tabourie_Lake	466	466	341	375	202	206	267	267	346	350	355	380	158	206
534	Tabourie_Lake	0	0	341	359	184	194	239	239	0	0	346	364	161	167
535	Tabourie_Lake	0	0	359	383	184	196	239	241	346	346	346	364	161	194
536	Tabourie_Lake	0	0	387	393	184	196	230	239	346	346	362	364	167	194
537	Tabourie_Lake	0	0	359	359	194	202	230	260	346	346	345	364	167	186
538	Tabourie_Lake	0	0	341	395	194	196	239	264	346	346	312	364	167	167
539	Tabourie_Lake	0	0	359	359	194	194	230	239	346	346	364	364	167	194
540	Tabourie_Lake	0	0	341	341	184	194	230	267	346	346	364	364	161	167
541	Tabourie_Lake	0	0	393	395	194	196	230	230	345	345	364	364	161	167
542	Tabourie_Lake	0	0	341	395	194	194	239	267	345	345	364	364	158	159
543	Tabourie_Lake	0	0	341	395	198	204	239	267	345	345	364	378	159	206
544	Tabourie_Lake	0	0	339	339	194	198	230	230	346	346	364	364	180	186
545	Tabourie_Lake	0	0	359	374	194	196	239	239	346	346	364	378	159	167
546	Tabourie_Lake	0	0	359	359	194	194	230	239	0	0	358	364	159	194
547	Tabourie_Lake	0	0	359	397	196	204	239	239	346	346	364	366	159	167
548	Tabourie_Lake	0	0	0	0	194	206	230	239	346	347	360	366	158	167
549	Tabourie_Lake	0	0	339	395	188	196	230	230	346	346	364	364	158	159
550	Tabourie_Lake	0	0	441	359	194	204	230	239	347	347	364	364	159	167
551	Tabourie_Lake	0	0	359	365	198	202	230	250	346	346	357	357	159	194
552	Tabourie_Lake	0	0	341	359	202	202	230	239	346	346	364	364	158	194
553	Tilba	445	445	341	365	184	200	239	281	345	345	355	359	158	161
554	Tilba	418	418	341	367	188	196	230	230	345	346	378	378	194	198
555	Tilba	418	418	339	365	192	210	230	277	345	345	382	384	158	206
556	Tilba	445	447	341	380	184	200	230	230	0	0	355	378	158	161
557	Tilba	445	445	373	380	200	200	230	264	0	0	359	378	161	206
558	Tilba	445	446	365	373	200	206	230	258	345	345	355	363	161	161
559	Tilba	418	445	373	373	200	208	230	264	345	345	335	355	159	159
560	Tilba	445	445	0	0	204	210	230	279	0	0	345	355	159	159
561	Tilba	418	466	341	380	184	208	239	264	345	345	355	355	158	158
562	Tilba	446	466	378	380	190	200	230	230	350	350	355	355	157	206
563	Tilba	418	418	341	365	204	208	230	230	350	350	358	358	159	194
564	Tilba	445	445	378	380	188	200	230	239	0	0	355	378	158	158
565	Tilba	445	453	341	380	188	196	230	264	0	0	378	378	158	159
566	Tilba	418	445	345	380	204	216	239	281	345	345	357	378	158	158
567	Tilba	418	427	339	367	200	206	230	239	345	350	359	359	161	194
568	Tilba	418	445	341	341	200	200	230	281	0	0	355	356	194	194
569	Tilba	445	446	341	341	200	216	230	230	350	350	378	378	159	159
570	Tilba	445	466	373	373	198	210	264	264	350	350	355	355	158	159
571	Tilba	445	466	0	0	204	206	230	230	0	0	345	384	180	206
572	Tilba	466	466	341	380	200	200	230	264	0	0	355	359	158	206
573	Cooma	0	0	0	0	194	200	230	239	345	350	0	0	158	158
574	Cooma	418	447	341	341	194	214	258	277	345	345	0	0	158	158
575	Cooma	418	418	0	0	210	216	239	239	345	345	0	0	0	0
576	Cooma	418	418	0	0	190	216	258	262	350	350	0	0	161	161
577	Cooma	418	446	365	365	194	216	230	230	350	350	0	0	158	161
578	Cooma	418	446	0	0	202	206	239	239	345	345	0	0	194	206
579	Cooma	418	447	0	0	204	204	267	273	345	345	0	0	158	158
580	Cooma	418	469	339	339	182	196	230	243	350	354	0	0	158	158
581	Cooma	445	446	0	0	200	200	262	264	345	345	0	0	157	157
582	Cooma	418	446	373	373	204	208	239	262	0	0	0	0	158	186
583	Cooma	418	418	341	341	196	212	241	241	345	346	0	0	158	158
584	Cooma	453	453	0	0	182	216	239	264	0	0	0	0	158	158
585	Cooma	418	446	0	0	200	210	241	241	345	350	0	0	158	158
586	Cooma	418	445	341	341	194	196	230	239	346	346	347	358	158	167
587	Cooma	418	418	317	319	184	204	258	277	345	345	0	0	161	161
588	Cooma	418	418	0	0	194	214	230	230	345	345	0	0	161	161
589	Cooma	418	445	339	341	204	208	262	264	345	345	0	0	159	194
590	Cooma	418	446	0	0	184	206	230	230	345	345	0	0	157	157
591	Cooma	418	445	365	373	200	210	239	239	345	345	0	0	161	196
592	Eden	453	466	341	341	196	216	258	275	347	350	347	347	167	194
593	Eden	418	466	341	341	182	194	239	239	346	346	358	358	180	196
594	Eden	445	469	341	341	194	204	239	239	346	350	311	311	161	206
595	Eden	427	445	341	341	192	204	241	264	346	346	359	359	194	194
596	Eden	445	466	341	343	192	204	264	264	0	0	358	358	161	194
597	Eden	445	466	341	341	206	208	230	230	346	350	358	358	159	159
598	Eden	418	445	341	341	206	206	239	264	0	0	0	0	194	206
599	Eden	445	453	339	365	200	208	230	239	346	346	353	358	158	159
600	Eden	0	0	0	0	198	206	239	239	345	345	308	355	159	206
601	Eden	445	453	317	341	200	208	230	239	346	354	366	366	161	206
602	Eden	445	445	378	380	194	212	230	239	345	345	349	358	206	206
603	Eden	418	445	319	341	206	206	239	264	345	345	355	361	157	194
604	Eden	447	469	339	373	194	204	230	262	346	346	357	361	167	180
605	Eden	418	469	339	365	202	214	239	258	345	345	358	363	158	159
606	Eden	445	469	319	339	200	202	258	264	346	346	363	363	159	159
607	Eden	0	0	339	341	202	204	239	262	0	0	357	357	159	194
608	Eden	0	0	365	380	182	182	230	239	345	345	361	361	158	161
609	Eden	0	0	341	397	204	210	230	264	0	0	356	361	194	200
610	Eden	0	0	0	0	196	206	230	241	350	350	347	355	167	206
611	Eden	0	0	0	0	204	206	230	241	345	345	355	359	161	194

## Sheet: SA & AU cpSSRs
3	418	13	95	128	20	20	17	19	18	11	18	20	19	14	19	2	223	195
Senecio madagascariensis haploid data			P2	P1	Boesmansriviermond	Pennington	Port_Edward	Summerveld	Richmond	Pietermaritzburg	Vryheid	Denny_Dalton	Ongoye	Tinley_Manor	Durban		Australia	South_Africa
Sample	Pop	Ccmp1	Ccmp2	Ccmp3
NSW78553	P2	159	217	112
NSW686021	P2	159	217	112
NSW668060	P2	160	217	112
NSW593726	P2	160	217	112
NSW55619	P2	159	218	112
NSW55607	P2	159	217	112
NSW55555	P2	159	217	112
NSW541272	P2	158	217	113
NSW541270	P2	158	218	113
NSW522092	P2	159	218	112
NSW519868_AQ493992	P2	159	217	112
NSW503638	P2	159	217	112
NSW390740	P2	159	217	112
NSW381055	P2	159	217	112
NSW295978	P2	159	217	112
NSW295977	P2	159	217	112
NSW295976	P2	159	217	112
NSW295975	P2	159	217	112
NSW295970	P2	159	217	112
NSW295966	P2	159	218	112
NSW295964	P2	159	217	112
NSW295960	P2	159	218	112
NSW246965	P2	159	218	112
AQ779722_BRI	P2	159	217	112
AQ777318_BRI	P2	159	217	112
AQ772943_BRI	P2	159	217	112
AQ770052_BRI	P2	159	217	112
AQ762677_BRI	P2	159	217	112
AQ733791_BRI	P2	159	217	112
AQ718543_BRI	P2	159	217	112
AQ696717_BRI	P2	160	217	112
AQ678227_BRI	P2	159	217	112
AQ669559_BRI	P2	160	217	112
AQ668744_BRI	P2	159	217	112
AQ666221_BRI	P2	159	217	112
AQ663682_BRI	P2	159	217	112
AQ662938_BRI	P2	159	218	112
AQ657897_BRI	P2	159	217	112
AQ653854_BRI	P2	159	217	112
AQ652248_BRI	P2	159	217	112
AQ636843_BRI	P2	159	217	112
AQ635596_BRI	P2	159	217	112
AQ628286_BRI	P2	159	217	112
AQ626231_BRI	P2	159	217	112
AQ623190_BRI	P2	159	217	112
AQ620656_BRI	P2	159	217	112
AQ620247_BRI	P2	159	217	112
AQ612433_BRI	P2	160	217	112
AQ609012_BRI	P2	159	217	112
AQ601896_BRI	P2	159	217	112
AQ583511_BRI	P2	159	217	112
AQ577210_BRI	P2	159	217	112
AQ568402_BRI	P2	159	217	112
AQ566530_BRI	P2	159	217	112
AQ559383_BRI	P2	159	217	112
AQ559074_BRI	P2	159	217	112
AQ554778_BRI_C	P2	159	217	112
AQ554778_BRI_B	P2	159	217	112
AQ554778_BRI_A	P2	160	217	112
AQ554610_BRI	P2	159	217	112
AQ545826_BRI	P2	159	217	112
AQ532471_BRI	P2	159	217	112
AQ532470_BRI	P2	159	217	112
AQ532469_BRI	P2	159	217	112
AQ520331_BRI	P2	159	217	112
AQ505839_BRI	P2	159	217	112
AQ502824_BRI	P2	159	218	112
AQ502059_BRI	P2	159	217	112
AQ499204_BRI	P2	159	217	112
AQ498975_BRI	P2	159	217	112
AQ498248_BRI	P2	159	217	112
AQ495128_BRI	P2	159	217	112
AQ494221_BRI	P2	159	217	112
AQ493992_BRI	P2	159	217	112
AQ492745_BRI	P2	159	218	112
AQ489259_BRI	P2	159	217	112
AQ473360_BRI	P2	159	217	112
AQ457127_445621_BRI	P2	159	217	112
AQ451530_404859_BRI	P2	159	217	112
AQ435673_408658_BRI	P2	159	218	112
AQ409444_423484_BRI	P2	159	217	112
AQ409443_BRI	P2	159	217	112
AQ407991_399302_BRI	P2	159	217	112
AQ407937_BRI	P2	159	217	112
AQ398767_359596_BRI	P2	159	217	112
AQ398756_363784_BRI	P2	159	217	112
AQ270914_210290_BRI	P2	159	217	112
AQ270827_037931_BRI	P2	159	217	112
717932A_MEL	P2	159	217	112
289433A_MEL	P2	159	217	112
238312A_MEL	P2	159	217	112
221870A_MEL	P2	159	217	112
2198827A_MEL	P2	159	217	112
2192971A_MEL	P2	159	217	112
1585254A_MEL_AQ47176	P2	159	217	112
NSW98340	P1	159	217	112
NSW98339	P1	159	217	112
NSW295590	P1	159	217	112
NSW77880	P1	159	218	112
NSW708071	P1	159	217	112
NSW675911_B	P1	159	217	112
NSW675911_A	P1	159	217	112
NSW586932	P1	160	217	112
NSW573002	P1	159	217	112
NSW573001	P1	159	217	112
NSW55617	P1	159	217	112
NSW55608	P1	159	218	112
NSW55556	P1	159	217	112
NSW55541	P1	159	217	112
NSW55530	P1	159	217	112
NSW55527	P1	159	217	112
NSW55480	P1	159	217	112
NSW541269	P1	160	218	112
NSW541267_B	P1	159	217	112
NSW541267_A	P1	159	217	112
NSW522094_AQ636845	P1	159	217	112
NSW522093_AQ636846_D	P1	159	218	112
NSW522093_AQ636846_C	P1	159	217	112
NSW522093_AQ636846_B	P1	159	218	112
NSW522093_AQ636846_A	P1	159	217	112
NSW522091_B	P1	159	217	112
NSW522091_A	P1	159	217	112
NSW522090	P1	159	217	112
NSW522089	P1	159	217	112
NSW500932	P1	159	217	112
NSW490808	P1	159	218	112
NSW483521	P1	159	217	112
NSW468092	P1	159	218	112
NSW465289	P1	159	217	112
NSW463391	P1	159	217	112
NSW461084	P1	160	217	112
NSW441339	P1	160	217	112
NSW440445	P1	159	217	112
NSW420416	P1	159	217	112
NSW419347	P1	159	217	112
NSW416549	P1	160	218	112
NSW414682	P1	159	217	112
NSW414660	P1	160	217	112
NSW414274	P1	159	217	112
NSW400272	P1	160	217	112
NSW391477	P1	159	217	112
NSW295974	P1	159	217	112
NSW295973	P1	159	217	112
NSW295972	P1	159	217	112
NSW295971	P1	160	217	112
NSW295967	P1	159	218	112
NSW295963	P1	159	218	112
NSW295961	P1	159	217	112
NSW295958	P1	159	217	112
NSW295955	P1	160	217	112
NSW295953	P1	159	217	112
NSW295952	P1	159	217	112
NSW295950	P1	160	217	112
NSW295949	P1	159	217	112
NSW295946	P1	159	217	112
NSW295942	P1	160	218	112
NSW295941	P1	159	217	112
NSW295940	P1	159	218	112
NSW295934	P1	159	217	112
NSW295932_B	P1	159	217	112
NSW295932_A	P1	159	217	112
NSW295931	P1	159	217	112
NSW295591_B	P1	159	217	112
NSW295591_A	P1	159	217	112
NSW295589	P1	159	218	112
NSW295588	P1	159	217	112
NSW295587	P1	160	217	112
NSW295586	P1	159	217	112
NSW295577	P1	159	217	112
NSW295004	P1	160	217	112
NSW294915	P1	159	218	112
NSW294493	P1	159	217	112
NSW283293	P1	159	217	112
NSW267500	P1	160	218	112
NSW238644	P1	159	217	112
NSW237745	P1	159	218	112
NSW153253_C	P1	159	217	112
NSW143624	P1	159	217	112
NSW143622	P1	159	217	112
NSW143621	P1	159	217	112
NSW143620	P1	159	217	112
NSW130097	P1	159	217	112
NSW100855	P1	159	217	112
AQ681986_BRI	P1	160	217	112
AQ636846_BRI	P1	159	218	112
AQ636845_BRI	P1	159	217	112
AQ636844_BRI	P1	160	217	112
AQ597973_BRI	P1	160	217	112
AQ589543_BRI	P1	159	218	112
AQ535533_BRI	P1	159	217	112
AQ532606_BRI_NSW406737	P1	160	217	112
AQ472978_BRI	P1	159	217	112
AQ439826_281915_BRI	P1	159	217	112
AQ426976_412684_BRI	P1	159	218	112
AQ337054_288772_BRI	P1	159	217	112
AQ270867_061062_BRI	P1	159	217	112
646047A_MEL	P1	159	217	112
602263A_MEL	P1	159	217	112
599788A_MEL	P1	159	217	112
295948A_MEL	P1	159	218	112
288944A_MEL	P1	160	217	112
247967A_MEL	P1	159	217	112
247962A_MEL	P1	159	217	112
247960A_MEL	P1	159	218	112
247945A_MEL	P1	159	217	112
247946A_MEL	P1	159	218	112
241954A_MEL	P1	159	217	112
238315A_MEL_AQ636846	P1	159	217	112
238314A_MEL	P1	159	217	112
238313A_MEL	P1	159	217	112
2301703A_MEL	P1	159	218	112
2301702A_MEL	P1	159	218	112
2299677A_MEL	P1	160	217	112
2282376A_MEL	P1	159	218	112
2244933A_MEL	P1	159	218	112
2173187A_MEL	P1	159	217	112
2123221A_MEL	P1	159	217	112
2105872A_MEL	P1	159	217	112
2097567A_MEL	P1	159	218	112
2076342A_MEL	P1	159	217	112
2042501A_MEL	P1	159	217	112
2012780A_MEL	P1	159	217	112
1057811A_MEL	P1	159	218	112
1	Boesmansriviermond	160	217	112
2	Boesmansriviermond	159	217	112
3	Boesmansriviermond	159	217	112
4	Boesmansriviermond	159	217	112
5	Boesmansriviermond	159	217	112
6	Boesmansriviermond	159	217	112
7	Boesmansriviermond	159	217	112
8	Boesmansriviermond	159	217	112
9	Boesmansriviermond	159	217	112
10	Boesmansriviermond	159	217	112
11	Boesmansriviermond	159	217	112
12	Boesmansriviermond	159	217	112
13	Boesmansriviermond	159	217	112
14	Boesmansriviermond	159	217	112
15	Boesmansriviermond	159	217	112
16	Boesmansriviermond	159	217	112
17	Boesmansriviermond	159	217	112
18	Boesmansriviermond	159	217	112
19	Boesmansriviermond	159	218	112
20	Boesmansriviermond	159	217	112
21	Pennington	159	218	112
22	Pennington	159	218	112
23	Pennington	161	217	112
24	Pennington	161	217	112
25	Pennington	159	218	112
26	Pennington	161	217	112
27	Pennington	159	218	112
28	Pennington	159	218	112
29	Pennington	159	218	112
30	Pennington	159	217	112
31	Pennington	159	217	112
32	Pennington	161	217	112
33	Pennington	161	217	112
34	Pennington	159	218	112
35	Pennington	161	217	112
36	Pennington	161	218	112
37	Pennington	159	218	112
38	Pennington	159	218	112
39	Pennington	159	218	112
40	Pennington	159	218	112
41	Port_Edward	159	217	115
42	Port_Edward	161	217	112
43	Port_Edward	159	217	112
44	Port_Edward	159	217	112
45	Port_Edward	159	217	112
46	Port_Edward	159	217	112
47	Port_Edward	159	217	112
48	Port_Edward	159	217	112
49	Port_Edward	159	218	112
50	Port_Edward	159	217	112
51	Port_Edward	159	217	112
52	Port_Edward	159	217	112
53	Port_Edward	159	217	112
54	Port_Edward	159	217	112
55	Port_Edward	159	219	115
56	Port_Edward	159	217	112
57	Port_Edward	159	217	112
58	Summerveld	159	217	112
59	Summerveld	160	217	112
60	Summerveld	159	218	112
61	Summerveld	159	217	112
62	Summerveld	159	219	115
63	Summerveld	159	217	112
64	Summerveld	159	217	112
65	Summerveld	159	219	112
66	Summerveld	159	219	115
67	Summerveld	159	217	112
68	Summerveld	159	217	112
69	Summerveld	159	217	112
70	Summerveld	159	217	112
71	Summerveld	159	217	112
72	Summerveld	159	219	112
73	Summerveld	159	217	112
74	Summerveld	159	217	112
75	Summerveld	159	217	115
76	Summerveld	159	218	112
77	Richmond	159	217	112
78	Richmond	159	217	112
79	Richmond	159	218	112
80	Richmond	159	217	112
81	Richmond	159	217	112
82	Richmond	159	217	112
83	Richmond	159	217	112
84	Richmond	160	217	112
85	Richmond	159	217	112
86	Richmond	159	218	112
87	Richmond	159	217	112
88	Richmond	159	217	115
89	Richmond	159	217	112
90	Richmond	159	217	112
91	Richmond	159	218	112
92	Richmond	159	217	112
93	Richmond	159	217	112
94	Richmond	159	217	112
95	Pietermaritzburg	159	217	112
96	Pietermaritzburg	159	217	112
97	Pietermaritzburg	159	218	115
98	Pietermaritzburg	160	217	112
99	Pietermaritzburg	159	217	112
100	Pietermaritzburg	159	217	112
101	Pietermaritzburg	160	217	112
102	Pietermaritzburg	159	217	112
103	Pietermaritzburg	159	218	115
104	Pietermaritzburg	159	217	112
105	Pietermaritzburg	159	219	115
106	Vryheid	159	219	115
107	Vryheid	160	218	112
108	Vryheid	160	217	112
109	Vryheid	160	217	112
110	Vryheid	160	217	112
111	Vryheid	160	217	112
112	Vryheid	159	218	112
113	Vryheid	160	218	112
114	Vryheid	160	218	112
115	Vryheid	160	217	112
116	Vryheid	159	217	112
117	Vryheid	160	217	112
118	Vryheid	159	217	112
119	Vryheid	159	217	112
120	Vryheid	159	217	112
121	Vryheid	159	219	115
122	Vryheid	159	217	112
123	Vryheid	160	217	112
124	Denny_Dalton	160	217	112
125	Denny_Dalton	160	218	115
126	Denny_Dalton	160	219	115
127	Denny_Dalton	160	217	112
128	Denny_Dalton	160	218	112
129	Denny_Dalton	160	219	115
130	Denny_Dalton	160	217	112
131	Denny_Dalton	160	218	112
132	Denny_Dalton	159	218	112
133	Denny_Dalton	159	218	112
134	Denny_Dalton	159	218	112
135	Denny_Dalton	159	218	112
136	Denny_Dalton	159	217	112
137	Denny_Dalton	159	218	112
138	Denny_Dalton	159	218	112
139	Denny_Dalton	159	218	112
140	Denny_Dalton	159	217	112
141	Denny_Dalton	159	219	115
142	Denny_Dalton	160	219	115
143	Denny_Dalton	160	219	115
144	Ongoye	159	219	112
145	Ongoye	159	217	112
146	Ongoye	159	217	112
147	Ongoye	159	217	112
148	Ongoye	159	217	112
149	Ongoye	159	218	112
150	Ongoye	159	217	112
151	Ongoye	159	217	112
152	Ongoye	159	217	112
153	Ongoye	159	217	112
154	Ongoye	159	217	112
155	Ongoye	159	218	112
156	Ongoye	159	218	112
157	Ongoye	159	218	115
158	Ongoye	159	217	112
159	Ongoye	159	217	112
160	Ongoye	159	217	112
161	Ongoye	159	219	112
162	Ongoye	159	218	112
163	Tinley_Manor	159	217	112
164	Tinley_Manor	159	217	112
165	Tinley_Manor	159	218	112
166	Tinley_Manor	159	218	112
167	Tinley_Manor	159	217	112
168	Tinley_Manor	159	217	112
169	Tinley_Manor	159	217	112
170	Tinley_Manor	159	217	112
171	Tinley_Manor	159	217	112
172	Tinley_Manor	159	217	112
173	Tinley_Manor	159	217	112
174	Tinley_Manor	159	217	112
175	Tinley_Manor	159	218	112
176	Tinley_Manor	159	218	112
177	Durban	159	217	112
178	Durban	159	217	112
179	Durban	159	217	112
180	Durban	159	217	112
181	Durban	159	217	112
182	Durban	159	217	112
183	Durban	159	217	112
184	Durban	159	217	112
185	Durban	159	217	112
186	Durban	159	217	112
187	Durban	159	217	112
188	Durban	159	218	112
189	Durban	159	219	115
190	Durban	159	217	112
191	Durban	159	218	112
192	Durban	159	218	112
193	Durban	159	217	112
194	Durban	159	217	112
195	Durban	159	218	112
