# Supplementary material for: Genetic Bottlenecks in Time and Space: Reconstructing Invasions from Contemporary and Historical Collections
Source: PubMed Central journal article supplement (PMC4156389; doi:10.1371/journal.pone.0106874), 2014-09-05
Supplement: pone.0106874.s002.pdf [file pone.0106874.s002.pdf]

| <b>Herbarium</b>                 | <b>Site</b>                       | <b>Latitude</b>        | <b>Longitude</b> | <b>Voucher number</b> | <b>Ploidy</b> |         |
|----------------------------------|-----------------------------------|------------------------|------------------|-----------------------|---------------|---------|
| South African National Herbarium | Vryheid, KZN                      | S 27° 47' 4"           | E 30° 48' 25"    | JGR 1101              | diploid       |         |
|                                  | Hluhluwe, KZN                     | S 27° 48' 48"          | E 32° 24' 5"     | JGR 1103              | polyploid     |         |
|                                  | Denny Dalton, KZN                 | S 28° 17' 3"           | E 31° 12' 42"    | JGR 1102              | diploid       |         |
|                                  | Ongoye, KZN                       | S 28° 54' 4"           | E 31° 48' 38"    | JGR 1106              | diploid       |         |
|                                  | Tinley Manor, KZN                 | S 29° 27' 2"           | E 31° 16' 58"    | JGR 1107              | diploid       |         |
|                                  | Pietermaritzburg, KZN             | S 29° 38' 10"          | E 30° 24' 8"     | JGR 1117              | diploid       |         |
|                                  | Summerveld, KZN                   | S 29° 48' 6"           | E 30° 42' 35"    | JGR 1115              | diploid       |         |
|                                  | Durban, KZN                       | S 29° 51' 51"          | E 30° 58' 56"    | JGR 1108              | diploid       |         |
|                                  | Richmond, KZN                     | S 29° 52' 58"          | E 30° 16' 48"    | JGR 1116              | diploid       |         |
|                                  | Pennington, KZN                   | S 30° 22' 42"          | E 30° 40' 34"    | JGR 1109              | diploid       |         |
|                                  | Port Edward, KZN                  | S 31° 2' 5"            | E 30° 10' 44"    | JGR 1114              | diploid       |         |
|                                  | Stellenbosch University Herbarium | Boesmansriviermond, EC | S 33° 41' 4"     | E 26° 39' 12"         | SA/SMAD/A2/01 | diploid |
|                                  | Queensland Herbarium              | Halfway Creek, NSW     | S 29° 56' 6"     | E 153° 5' 44"         | AQ741268      | diploid |
