# Supplementary material for: Genetic Bottlenecks in Time and Space: Reconstructing Invasions from Contemporary and Historical Collections
Source: PubMed Central journal article supplement (PMC4156389; doi:10.1371/journal.pone.0106874), 2014-09-05
Supplement: pone.0106874.s003.pdf [file pone.0106874.s003.pdf]

| Population                                      | Latitude      | Longitude      | <i>n</i> | <i>A</i> | <i>A<sub>r</sub></i> | <i>A<sub>pr</sub></i> | <i>H<sub>o</sub></i> | <i>H<sub>c</sub></i> | <i>F<sub>IS</sub></i> | <i>F<sub>IS-c</sub></i> | <i>D<sub>est</sub></i> | <i>F<sub>ST</sub></i><br>(±SE) <sup>a</sup> | <i>F'<sub>ST</sub></i><br>(±SE) <sup>a</sup> |
|-------------------------------------------------|---------------|----------------|----------|----------|----------------------|-----------------------|----------------------|----------------------|-----------------------|-------------------------|------------------------|---------------------------------------------|----------------------------------------------|
| <b>South Africa (native)</b>                    |               |                |          |          |                      |                       |                      |                      |                       |                         |                        |                                             |                                              |
| Vryheid, KZN                                    | S 27° 47' 4"  | E 30° 48' 25"  | 20       | 10.9     | 6.5                  | 0.065                 | 0.599                | 0.839                | 0.264                 | 0.055                   |                        |                                             |                                              |
| Denny Dalton, KZN                               | S 28° 17' 3"  | E 31° 12' 42"  | 20       | 10.9     | 6.3                  | 0.234                 | 0.606                | 0.826                | 0.263                 | 0.072                   |                        |                                             |                                              |
| Ongoye, KZN                                     | S 28° 54' 4"  | E 31° 48' 38"  | 20       | 11.0     | 7.2                  | 0.124                 | 0.629                | 0.871                | 0.269                 | 0.059                   |                        |                                             |                                              |
| Tinley Manor, KZN                               | S 29° 27' 2"  | E 31° 16' 58"  | 20       | 12.1     | 7.6                  | 0.052                 | 0.513                | 0.860                | 0.380                 | 0.149                   |                        |                                             |                                              |
| Pietermaritzburg, KZN                           | S 29° 38' 10" | E 30° 24' 8"   | 20       | 12.6     | 7.2                  | 0.194                 | 0.678                | 0.845                | 0.185                 | 0.095                   |                        |                                             |                                              |
| Summerveld, KZN                                 | S 29° 48' 6"  | E 30° 42' 35"  | 20       | 13.7     | 7.3                  | 0.671                 | 0.628                | 0.870                | 0.261                 | 0.068                   |                        |                                             |                                              |
| Durban, KZN                                     | S 29° 51' 51" | E 30° 58' 56"  | 20       | 12.9     | 6.8                  | 0.029                 | 0.614                | 0.855                | 0.258                 | 0.177                   |                        |                                             |                                              |
| Richmond, KZN                                   | S 29° 52' 58" | E 30° 16' 48"  | 19       | 12.3     | 6.7                  | 0.187                 | 0.693                | 0.860                | 0.196                 | 0.026                   |                        |                                             |                                              |
| Pennington, KZN                                 | S 30° 22' 42" | E 30° 40' 34"  | 20       | 11.1     | 6.1                  | 0.304                 | 0.624                | 0.819                | 0.263                 | 0.034                   |                        |                                             |                                              |
| Port Edward, KZN                                | S 31° 2' 5"   | E 30° 10' 44"  | 19       | 12.0     | 7.9                  | 0.203                 | 0.585                | 0.865                | 0.305                 | 0.031                   |                        |                                             |                                              |
| Boesmansriviermond, EC                          | S 33° 41' 4"  | E 26° 39' 12"  | 20       | 8.4      | 6.2                  | 0.530                 | 0.493                | 0.711                | 0.237                 | 0.085                   |                        |                                             |                                              |
| Mean (±SE) South Africa                         |               |                | 19.8     | 11.6     | 6.9                  | 0.236                 | 0.606                | 0.838                | 0.262                 | 0.077                   |                        |                                             |                                              |
|                                                 |               |                | (±0.1)   | (±0.6)   | (±0.2)               | (±0.061)              | (±0.028)             | (±0.015)             | (±0.015)              | (±0.014)                |                        |                                             |                                              |
| Total South Africa                              |               |                | 218      | 32.3     | 7.8                  | 4.008                 | 0.611                | 0.883                | 0.883                 | 0.048                   | 0.283                  | 0.044<br>(±0.013)                           | 0.289<br>(±0.085)                            |
| <b>Australia (invasive)</b>                     |               |                |          |          |                      |                       |                      |                      |                       |                         |                        |                                             |                                              |
| <b>Far North Queensland</b>                     |               |                |          |          |                      |                       |                      |                      |                       |                         |                        |                                             |                                              |
| Malanda, QLD†                                   | S 17° 30' 30" | E 145° 31' 08" | 16       | 6.1      | 4.9                  | <0.001                | 0.561                | 0.722                | 0.722                 | 0.033                   |                        |                                             |                                              |
| Herberton, QLD‡                                 | S 17° 25' 44" | E 145° 26' 15" | 20       | 5.9      | 4.4                  | <0.001                | 0.382                | 0.687                | 0.687                 | 0.050                   |                        |                                             |                                              |
| <b>Mid-Eastern Australian population (P2)</b>   |               |                |          |          |                      |                       |                      |                      |                       |                         |                        |                                             |                                              |
| Mount Glorious, QLD                             | S 27° 22' 37" | E 152° 50' 31" | 20       | 5.9      | 4.0                  | <0.001                | 0.552                | 0.670                | 0.670                 | 0.024                   |                        |                                             |                                              |
| Mitchelton, QLD                                 | S 27° 24' 44" | E 152° 57' 45" | 19       | 5.9      | 4.3                  | 0.001                 | 0.458                | 0.681                | 0.681                 | 0.053                   |                        |                                             |                                              |
| Oxenford, QLD                                   | S 27° 53' 23" | E 153° 18' 43" | 20       | 6.1      | 4.6                  | 0.007                 | 0.431                | 0.677                | 0.677                 | 0.056                   |                        |                                             |                                              |
| Canungra, QLD                                   | S 27° 58' 0"  | E 153° 8' 36"  | 20       | 7.4      | 4.6                  | 0.036                 | 0.446                | 0.698                | 0.698                 | 0.037                   |                        |                                             |                                              |
| Lamington, QLD                                  | S 28° 11' 7"  | E 153° 6' 56"  | 20       | 5.9      | 4.2                  | 0.002                 | 0.508                | 0.686                | 0.686                 | 0.055                   |                        |                                             |                                              |
| Halfway Creek, NSW                              | S 29° 56' 6"  | E 153° 5' 44"  | 20       | 7.9      | 5.0                  | <0.001                | 0.524                | 0.775                | 0.775                 | 0.095                   |                        |                                             |                                              |
| Mean ±SE P2                                     |               |                | 19.8     | 6.5      | 4.5                  | 0.008                 | 0.486                | 0.698                | 0.698                 | 0.053                   |                        |                                             |                                              |
|                                                 |               |                | (±0.2)   | (±0.4)   | (±0.1)               | (±0.006)              | (±0.044)             | (±0.022)             | (±0.022)              | (±0.009)                |                        |                                             |                                              |
| Total P2                                        |               |                | 119      | 13.4     | 5.2                  | 0.959                 | 0.492                | 0.758                | 0.758                 | 0.039                   | 0.158                  | 0.081<br>(±0.019)                           | 0.276<br>(±0.065)                            |
| <b>South-Eastern Australian population (P1)</b> |               |                |          |          |                      |                       |                      |                      |                       |                         |                        |                                             |                                              |
| Crescent Head, NSW                              | S 31° 7' 45"  | E 152° 52' 50" | 20       | 9.9      | 6.2                  | 0.042                 | 0.584                | 0.812                | 0.812                 | 0.043                   |                        |                                             |                                              |
| Elizabeth Beach, NSW                            | S 32° 19' 49" | E 152° 32' 9"  | 20       | 10.3     | 6.5                  | 0.129                 | 0.611                | 0.775                | 0.775                 | 0.037                   |                        |                                             |                                              |
| Hunter Valley, NSW                              | S 32° 36' 55" | E 152° 4' 45"  | 20       | 10.1     | 5.9                  | 0.001                 | 0.645                | 0.812                | 0.812                 | 0.038                   |                        |                                             |                                              |
| Black Hill, NSW                                 | S 32° 50' 20" | E 151° 37' 48" | 20       | 10.6     | 6.3                  | 0.096                 | 0.621                | 0.816                | 0.816                 | 0.040                   |                        |                                             |                                              |
| Raymond Terrace, NSW                            | S 32° 45' 58" | E 151° 44' 55" | 20       | 10.9     | 6.8                  | 0.002                 | 0.575                | 0.726                | 0.726                 | 0.095                   |                        |                                             |                                              |
| Jilliby, NSW                                    | S 33° 11' 58" | E 151° 27' 58" | 20       | 7.1      | 6.6                  | <0.001                | 0.489                | 0.683                | 0.683                 | 0.046                   |                        |                                             |                                              |
| Illawarra, NSW                                  | S 34° 31' 5"  | E 150° 45' 1"  | 20       | 8.4      | 5.6                  | 0.160                 | 0.552                | 0.740                | 0.740                 | 0.055                   |                        |                                             |                                              |
| Gerroa, NSW                                     | S 34° 46' 45" | E 150° 49' 19" | 19       | 10.0     | 6.6                  | 0.048                 | 0.565                | 0.855                | 0.855                 | 0.082                   |                        |                                             |                                              |
| Tabourie Lake, NSW                              | S 35° 23' 37" | E 150° 26' 18" | 20       | 7.3      | 5.2                  | <0.001                | 0.543                | 0.604                | 0.604                 | 0.022                   |                        |                                             |                                              |
| Cooma, NSW                                      | S 32° 19' 49" | E 152° 32' 9"  | 19       | 7.3      | 6.6                  | 0.005                 | 0.577                | 0.780                | 0.780                 | 0.056                   |                        |                                             |                                              |
| Tilba, NSW                                      | S 36° 14' 59" | E 150° 6' 14"  | 20       | 8.0      | 5.5                  | 0.068                 | 0.606                | 0.750                | 0.750                 | 0.040                   |                        |                                             |                                              |
| Eden, NSW                                       | S 37° 2' 29"  | E 149° 54' 30" | 20       | 9.4      | 6.6                  | 0.064                 | 0.671                | 0.814                | 0.814                 | 0.027                   |                        |                                             |                                              |

|                                        |                      |                     |                     |                         |                         |                         |                         |                         |        |                         |                         |
|----------------------------------------|----------------------|---------------------|---------------------|-------------------------|-------------------------|-------------------------|-------------------------|-------------------------|--------|-------------------------|-------------------------|
| Mean $\pm$ SE P1                       | 19.8<br>( $\pm$ 0.1) | 9.1<br>( $\pm$ 0.5) | 6.2<br>( $\pm$ 0.2) | 0.051<br>( $\pm$ 0.016) | 0.587<br>( $\pm$ 0.028) | 0.764<br>( $\pm$ 0.022) | 0.210<br>( $\pm$ 0.031) | 0.048<br>( $\pm$ 0.006) |        |                         |                         |
| Total P1                               | 238                  | 22.4                | 6.7                 | 2.331                   | 0.612                   | 0.833                   | 0.275                   | 0.027                   | 0.237§ | 0.049<br>( $\pm$ 0.010) | 0.240<br>( $\pm$ 0.049) |
| Mean $\pm$ SE Australia                | 19.7<br>( $\pm$ 0.2) | 8.0<br>( $\pm$ 1.3) | 5.5<br>( $\pm$ 0.2) | 0.038<br>( $\pm$ 0.011) | 0.545<br>( $\pm$ 0.023) | 0.738<br>( $\pm$ 0.015) | 0.250<br>( $\pm$ 0.028) | 0.049<br>( $\pm$ 0.005) |        |                         |                         |
| Total Australia                        | 393                  | 23.5                | 6.8                 | 2.997                   | 0.568                   | 0.843                   | 0.335                   | 0.038                   | 0.420§ | 0.100<br>( $\pm$ 0.012) | 0.422<br>( $\pm$ 0.051) |
| Mean $\pm$ SE South Africa & Australia | 19.8<br>( $\pm$ 0.1) | 9.3<br>( $\pm$ 0.3) | 6.0<br>( $\pm$ 0.2) | 0.105<br>( $\pm$ 0.028) | 0.567<br>( $\pm$ 0.018) | 0.774<br>( $\pm$ 0.012) | 0.254<br>( $\pm$ 0.021) | 0.059<br>( $\pm$ 0.006) |        |                         |                         |
| Total South Africa & Australia         | 611                  | 35.4                | 7.6                 |                         | 0.585                   | 0.880                   | 0.342                   | 0.047                   | 0.487§ | 0.100<br>( $\pm$ 0.013) | 0.459<br>( $\pm$ 0.060) |

\*Jackknifed over all loci

†Site clusters with southern Australian population

‡Site clusters with mid Australian population

§Two Australian populations (Jilliby and Raymond Terrace) excluded from calculation due to missing data
