# Supplementary material for: Genetic Bottlenecks in Time and Space: Reconstructing Invasions from Contemporary and Historical Collections
Source: PubMed Central journal article supplement (PMC4156389; doi:10.1371/journal.pone.0106874), 2014-09-05
Supplement: pone.0106874.s005.pdf [file pone.0106874.s005.pdf]

| Population                               | $N_i$                   | $N_h$                | $H$                      | $R_h$                    | Haplotypes |   |    |   |   |   |    |   |   |   |   |   |   |   |
|------------------------------------------|-------------------------|----------------------|--------------------------|--------------------------|------------|---|----|---|---|---|----|---|---|---|---|---|---|---|
|                                          |                         |                      |                          |                          | A          | B | C  | D | E | F | G  | H | I | J | K | L | M | N |
| <b>South Africa (native)</b>             |                         |                      |                          |                          |            |   |    |   |   |   |    |   |   |   |   |   |   |   |
| Vryheid, KZN                             | 18                      | 5(0)                 | 0.771                    | 3.945                    | 5          | – | 1  | – | – | 2 | 7  | 3 | – | – | – | – | – | – |
| Denny Dalton, KZN                        | 20                      | 7(1)                 | 0.832                    | 4.621                    | 2          | – | 7  | – | – | 1 | 3  | 2 | 1 | 4 | – | – | – | – |
| Ongoye, KZN                              | 19                      | 4(0)                 | 0.573                    | 2.397                    | 12         | – | 4  | 1 | 2 | – | –  | – | – | – | – | – | – | – |
| Tinley Manor, KZN                        | 14                      | 2(0)                 | 0.440                    | 1.000                    | 10         | – | 4  | – | – | – | –  | – | – | – | – | – | – | – |
| Pietermaritzburg, KZN                    | 11                      | 4(0)                 | 0.691                    | 3.833                    | 6          | – | –  | 2 | – | 1 | 2  | – | – | – | – | – | – | – |
| Summerveld, KZN                          | 19                      | 6(0)                 | 0.661                    | 3.667                    | 11         | 1 | 2  | – | 2 | 2 | 1  | – | – | – | – | – | – | – |
| Durban, KZN                              | 19                      | 3(0)                 | 0.433                    | 1.561                    | 14         | – | 4  | – | – | 1 | –  | – | – | – | – | – | – | – |
| Richmond, KZN                            | 18                      | 4(0)                 | 0.471                    | 2.179                    | 13         | 1 | 3  | – | – | – | 1  | – | – | – | – | – | – | – |
| Pennington, KZN                          | 20                      | 4(1)                 | 0.626                    | 2.358                    | 2          | – | 11 | – | – | – | –  | – | – | – | 6 | 1 | – | – |
| Port Edward, KZN                         | 17                      | 5(0)                 | 0.621                    | 2.425                    | 13         | 1 | 1  | – | – | 1 | –  | – | – | – | 1 | – | – | – |
| Boesmansriviermond, EC                   | 20                      | 3(0)                 | 0.195                    | 1.100                    | 18         | – | 1  | – | – | – | 1  | – | – | – | – | – | – | – |
| Mean $\pm$ SE South Africa               | 17.7<br>( $\pm 0.9$ )   | 4.3<br>( $\pm 0.4$ ) | 2.644<br>( $\pm 0.366$ ) | 0.574<br>( $\pm 0.054$ ) |            |   |    |   |   |   |    |   |   |   |   |   |   |   |
| Total South Africa                       | 195                     | 12(8)                | 3.331                    | 0.659                    | 106        | 3 | 38 | 3 | 4 | 8 | 15 | 5 | 1 | 4 | 7 | 1 | – | – |
| <b>Australia (invasive)</b>              |                         |                      |                          |                          |            |   |    |   |   |   |    |   |   |   |   |   |   |   |
| Mid-Eastern Australian population (P2)   | 95                      | 5(2*)                | 0.316                    | 1.451                    | 78         | – | 9  | – | – | – | 6  | – | – | – | – | – | 1 | 1 |
| South-Eastern Australian population (P1) | 128                     | 4(1†, 0*)            | 0.522                    | 1.998                    | 84         | – | 24 | – | – | – | 16 | 4 | – | – | – | – | – | – |
| Mean $\pm$ SE Australia                  | 111.5<br>( $\pm 16.5$ ) | 3.5<br>( $\pm 0.5$ ) | 1.725<br>( $\pm 0.274$ ) | 0.419<br>( $\pm 0.103$ ) |            |   |    |   |   |   |    |   |   |   |   |   |   |   |
| Total Australia                          | 223                     | 4(0)                 | 1.808                    | 0.442                    | 162        | – | 33 | – | – | – | 22 | 4 | – | – | – | – | 1 | 1 |
| Total South Africa & Australia           | 418                     | 14                   | 2.561                    | 0.552                    | 268        | 3 | 71 | 3 | 4 | 8 | 37 | 9 | 1 | 4 | 7 | 1 | 1 | 1 |

\* Australia and South Africa; † Australia only
