# Supplementary material for: Genetic Bottlenecks in Time and Space: Reconstructing Invasions from Contemporary and Historical Collections
Source: PubMed Central journal article supplement (PMC4156389; doi:10.1371/journal.pone.0106874), 2014-09-05
Supplement: pone.0106874.s006.pdf [file pone.0106874.s006.pdf]

---

| <b>Null hypothesis</b>                                                                                                        | <b><i>P</i></b> |
|-------------------------------------------------------------------------------------------------------------------------------|-----------------|
| Haplotypic composition of Australia in 1957 is a random sample of the diversity present in the native range                   | 0.633           |
| Haplotypic composition of Australia in 1987 is a random sample of the diversity present in the native range                   | <0.01           |
| Haplotypes G and H were not present in the first 32 herbarium records due to a sampling effect                                | 0.019           |
| Haplotypes G and H were both first found within 35 km of a major port by chance                                               | 0.012           |
| Similarities in haplotype composition between P1 and P2 can be explained by random independent sampling from the native range | 0.813           |

---
