# Supplementary material for: Genetic Bottlenecks in Time and Space: Reconstructing Invasions from Contemporary and Historical Collections
Source: PubMed Central journal article supplement (PMC4156389; doi:10.1371/journal.pone.0106874), 2014-09-05
Supplement: pone.0106874.s007.pdf [file pone.0106874.s007.pdf]

---

| <b>Port Name</b>  | <b>Size</b> | <b>Latitude</b> | <b>Longitude</b> |
|-------------------|-------------|-----------------|------------------|
| Port Botany       | Medium      | S 33° 58' 23"   | E 151° 12' 54"   |
| Port of Brisbane  | Large       | S 27° 22' 57"   | E 153° 10' 10"   |
| Port of Gladstone | Medium      | S 23° 49' 48"   | E 151° 15' 10"   |
| Port Kembla       | Medium      | S 34° 27' 45"   | E 150° 53' 58"   |
| Port of Melbourne | Very Large  | S 37° 49' 26"   | E 144° 54' 40"   |
| Port of Newcastle | Medium      | S 32° 54' 27"   | E 151° 46' 14"   |
| Port of Sydney    | Large       | S 33° 51' 44"   | E 151° 11' 33"   |

---
