# Supplementary material for: Genetic Bottlenecks in Time and Space: Reconstructing Invasions from Contemporary and Historical Collections
Source: PubMed Central journal article supplement (PMC4156389; doi:10.1371/journal.pone.0106874), 2014-09-05
Supplement: pone.0106874.s008.pdf [file pone.0106874.s008.pdf]

---

| <b>Genetic Diversity Measure</b> | <b>Kruskal-Wallis test <math>H_c</math></b> | <b>Dunn's post-hoc test result</b> |
|----------------------------------|---------------------------------------------|------------------------------------|
| $A$                              | 20.313****                                  | SA > P1** & P2****                 |
| $A_r$                            | 17.158***                                   | P2 < P1** & SA****                 |
| $A_{pr}$                         | 14.939***                                   | SA > P1** & P2***                  |
| $H_o$                            | 11.233**                                    | P2 < P1* & SA***                   |
| $H_e$                            | 16.741***                                   | SA > P1** & P2****                 |

---
